# Supplementary material
Source: Research Square preprint supplement (doi:10.21203/rs.3.rs-9580141/v1)
Supplement: Supplementary file 1 [file 35a46911aed0ca99e1a4e3bc.docx]

# Additional files

Additional file 1. Differential expression results. CSV file containing DESeq2 results for ketogenic diet versus control diet, including Ensembl identifiers, gene symbols, log2 fold-change, P values, adjusted P values, Entrez identifiers, and gene names.

Additional file 2. Pathway enrichment results. CSV files containing GO over-representation analysis, ranked GO GSEA, Hallmark GSEA results, and Hallmark comparison results across ketogenic diet versus control, high-fat diet versus control, and ketogenic diet versus high-fat diet contrasts.

Additional file 3. Reproducible R analysis scripts. R scripts used to process metadata, run differential expression, generate plots, compare diet contrasts, and perform pathway analyses.
